# Supplementary material
Source: MDPI journal article supplement (https://www.mdpi.com/2071-1050/12/12/5009)
Supplement: s1 [file s1]

Article

Supplementary

# Salento honey (Apulia, South east Italy): a preliminary characterization by $^1\text{H}$ -NMR metabolomic fingerprinting.

Chiara Roberta Girelli <sup>1</sup>, Roberta Schiavone <sup>1</sup>, Sebastiano Vilella <sup>1</sup>, Francesco Paolo Fanizzi <sup>1,\*</sup>

<sup>1</sup> Department of Biological and Environmental Sciences and Technologies, University of Salento, Prov.le Lecce-Monteroni, 73100 Lecce, Italy; chiara.girelli@unisalento.it (C.R.G.); roberta.schiavone@unisalento.it (R.S.); sebastiano.vilella@unisalento.it (S.V.); fp.fanizzi@unisalento.it (F.P.F.)

\* Correspondence: fp.fanizzi@unisalento.it; Tel.: +39-0832-29265

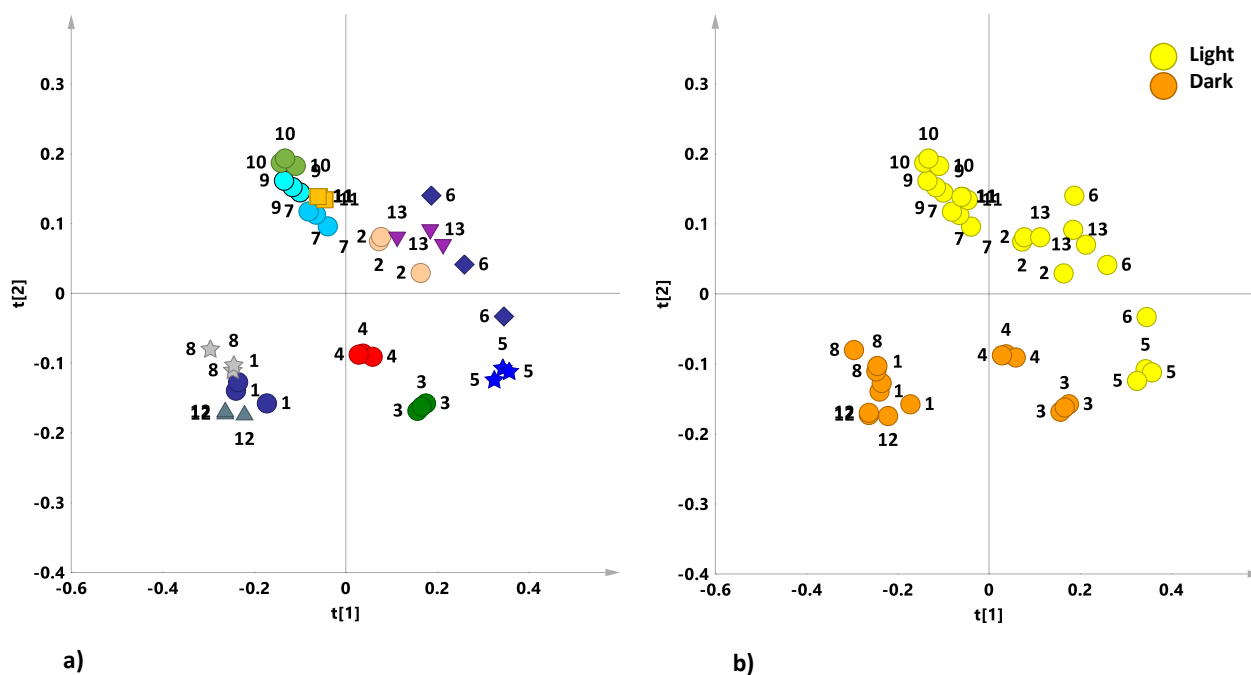

**Figure 1.** PCA  $t[1]/t[2]$  scores plot for the studied samples on the bucket reduced entire spectra. ( $t[1]$  and  $t[2]$  explain 56.6% and 25.3% of the total variance, respectively). Samples are labeled in progressive number by a 1 to 39. Samples symbol were colored by number of observations a) and color features b).

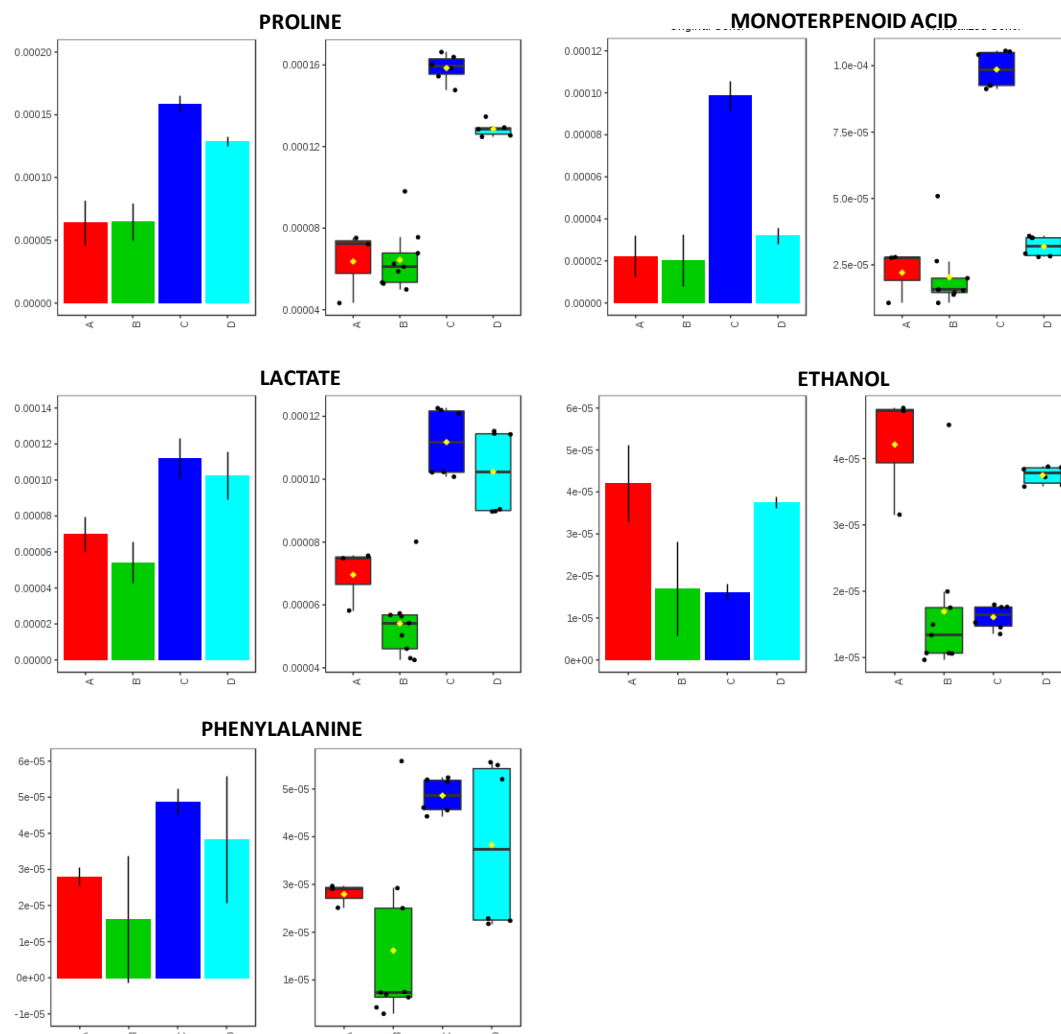

**Figure 2.** Discriminant metabolites multiple comparison graphical summary for light honey samples.

\*The bar plots on the left show the original values (mean +/- standard deviation of relative integrals). The box and whisker plots on the right summarize the normalized values. The notch indicates the 95% confidence interval around the median of each group, defined as  $1.58 \cdot \text{IQR} / \sqrt{n}$ , IQR meaning the interquartile range, sqrt standing for square root, and n representing the number of data points. The mean value of each group is indicated as a yellow diamond.

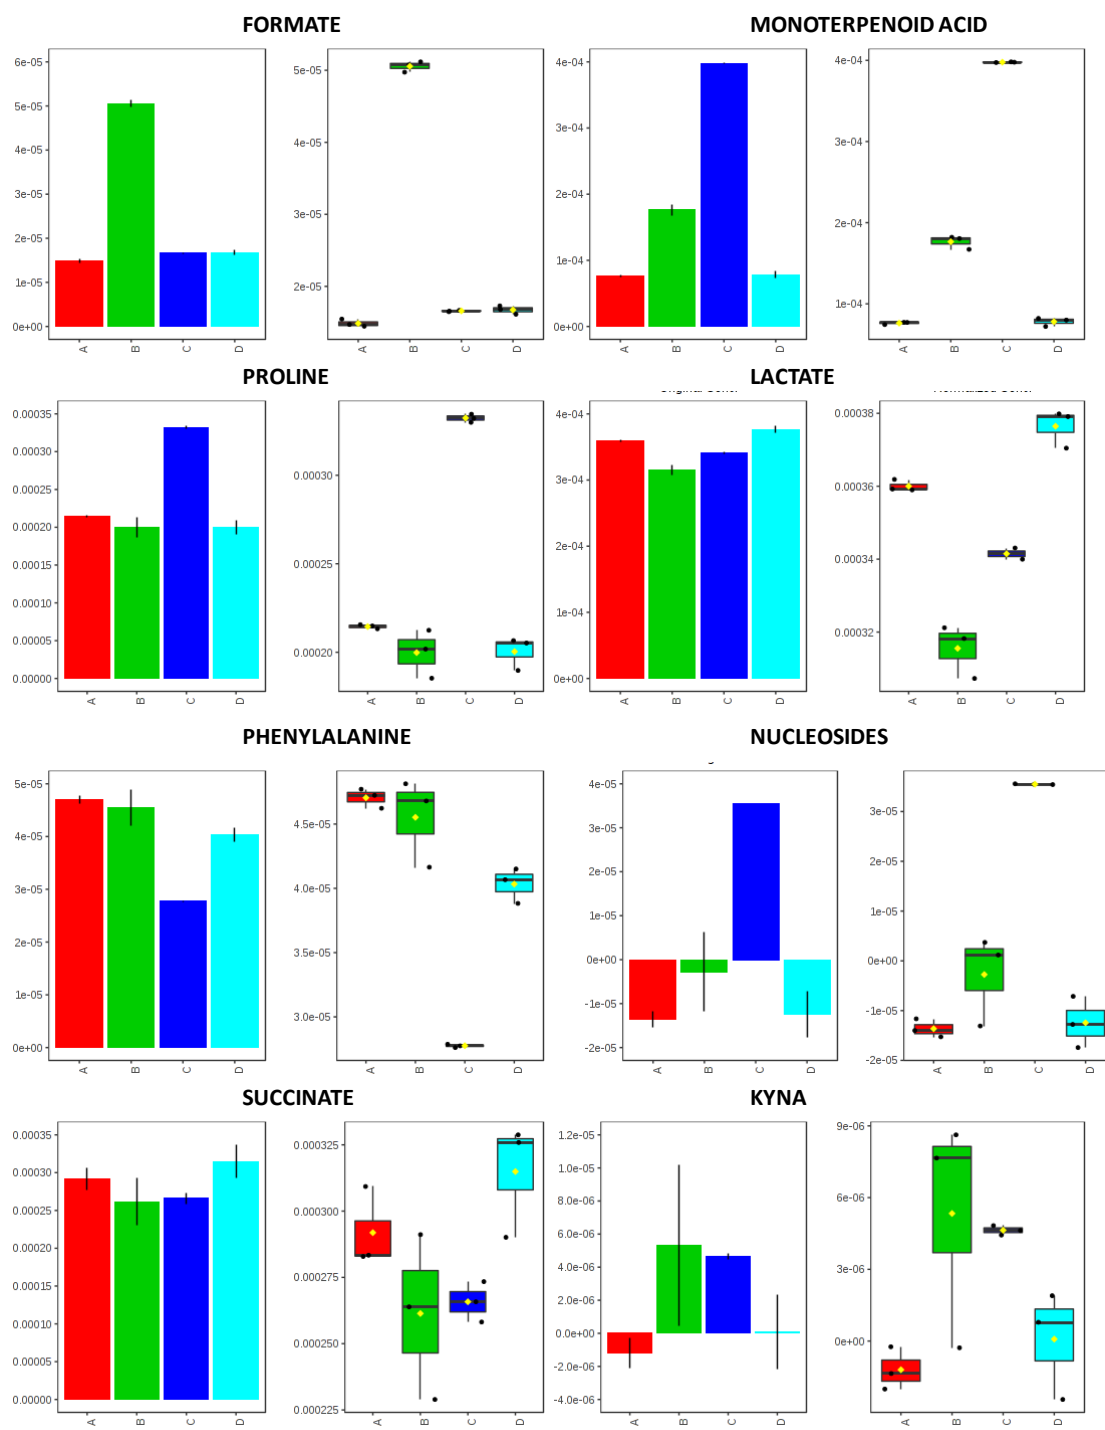

**Figure 3. Discriminant metabolites multiple comparison graphical summary for dark honey samples.**

\*The bar plots on the left show the original values (mean  $\pm$  standard deviation of relative integrals). The box and whisker plots on the right summarize the normalized values. The notch indicates the 95% confidence interval around the median of each group, defined as  $1.58 \cdot \text{IQR} / \sqrt{n}$ , IQR meaning the interquartile range, sqrt standing for square root, and n representing the number of data points. The mean value of each group is indicated as a yellow diamond.

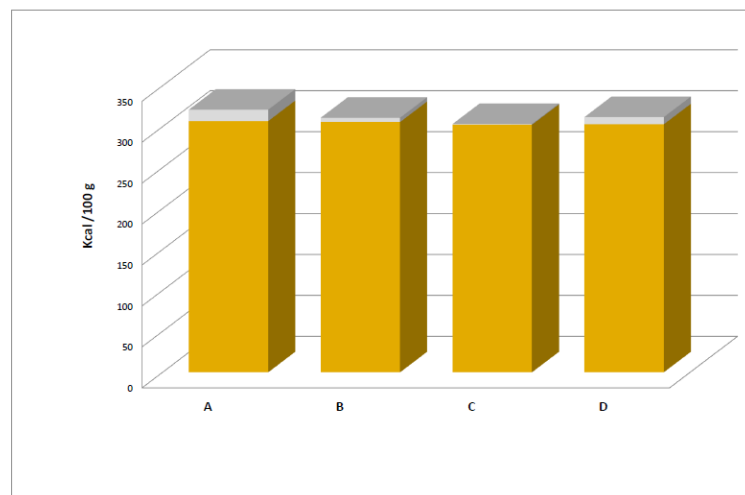

**Figure 4.** Caloric content (mean  $\pm$  S.D.;  $n = 3$ ) of different producers honey samples. Reported values are consistent with those reported in the literature [1].

#### Reference

1. Bogdanov, S.; Jurendic, T.; Sieber, R.; Gallmann, P. Honey for nutrition and health: a review. *Journal of the American College of Nutrition* **2008**, *27*, 677–689.

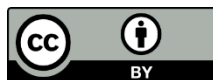

© 2020 by the authors. Licensee MDPI, Basel, Switzerland. This article is an open access article distributed under the terms and conditions of the Creative Commons Attribution (CC BY) license (<http://creativecommons.org/licenses/by/4.0/>).
